# Supplementary material
Source: PubMed Central journal article supplement (PMC3801448)

Supplemental Figure 1

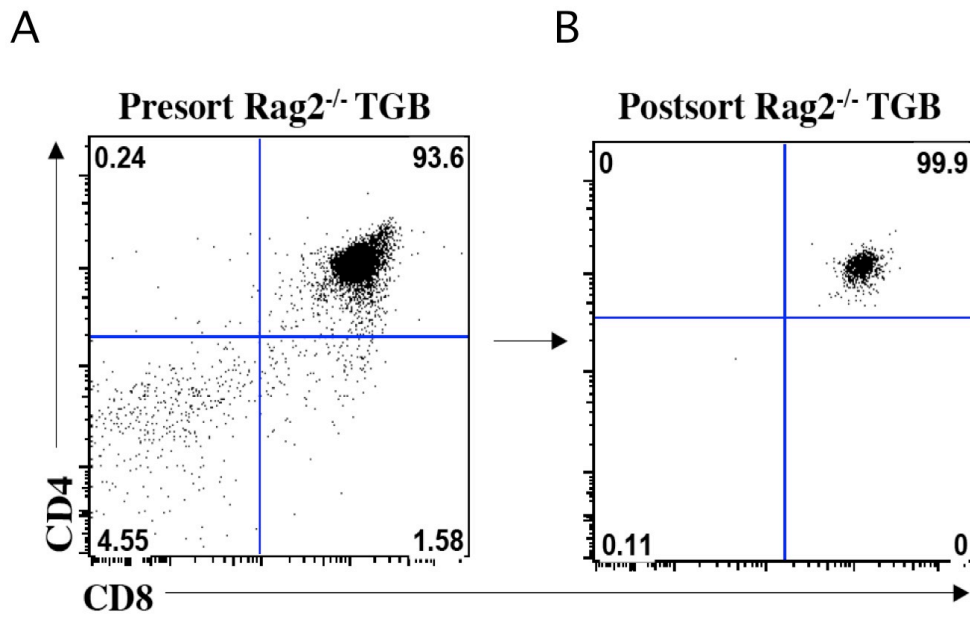

## Supplemental Figure 2

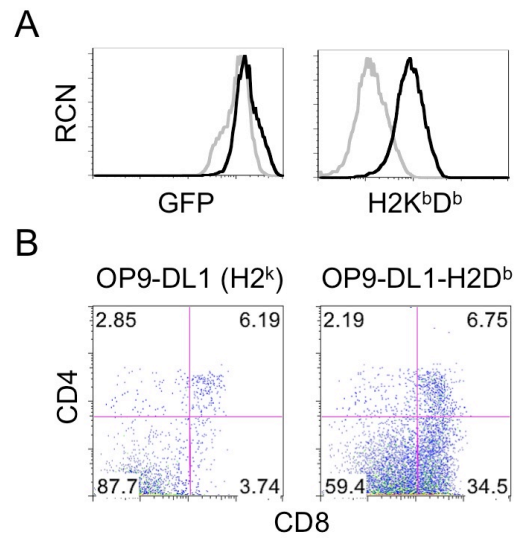

### Supplemental Figure 3

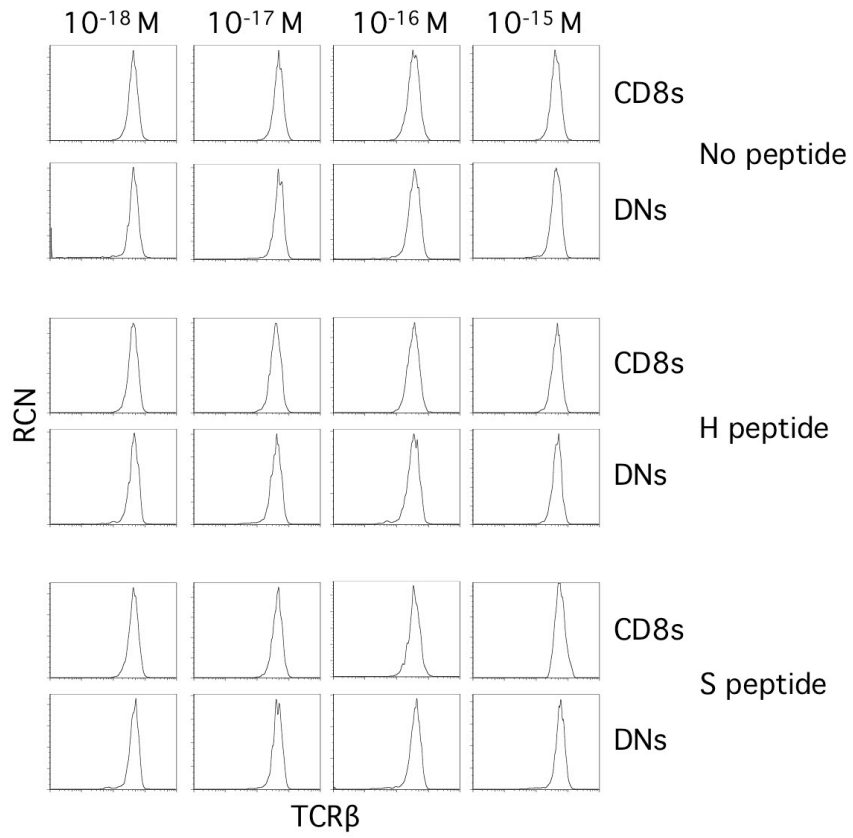

Supplement: NIHMS490384-supplement-2.pdf [file NIHMS490384-supplement-2.pdf]
